# Supplementary material for: Acanthopanax senticosus ameliorates steatohepatitis through HNF4 alpha pathway activation in mice
Source: PubMed Central journal article supplement (PMC10762184; doi:10.1038/s41598-023-50625-z), 2024-01-02

## Supplementary information

Supplementary Table S1. The primer sequences (5'–3') used in this study for qRT-PCR

|              |    |                         |
|--------------|----|-------------------------|
| MCP1         | F: | ATGCAGGTCCTGTCATGCTTC   |
|              | R: | GGCATCACAGTCCGAGTCACAC  |
| TNF alpha    | F: | AGGGTCTGGGCCATAGAACT    |
|              | R: | CCACCACGCTCTTCTGTCTAC   |
| F4/80        | F: | GAAGGCTCCCAAGGATATGGA   |
|              | R: | TGCTTGGCATTGCTGTATCTG   |
| IL-1b        | F: | GGTCAAAGGTTTGGAAAGCAG   |
|              | R: | TGTGAAATGCCACCTTTTGA    |
| TIMP1        | F: | AGGTGGTCTCGTTGATTTCT    |
|              | R: | GTAAGGCCTGTAGCTGTGCC    |
| Col 1a       | F: | TAGGACTGACCAAGGTGGCT    |
|              | R: | GGAACCTGGTTTCTTCTCACC   |
| TGF b1       | F: | CTCCCGTGGCTTCTAGTGC     |
|              | R: | GCCTTAGTTTGGACAGGATCTG  |
| Acta2        | F: | CCCGTGGTCATCGTCTCAG     |
|              | R: | GGACAGGGCACCATTGAAGG    |
| HNF4 alpha   | F: | CACGCGGAGGTCAAGCTAC     |
|              | R: | CCCAGAGATGGGAGAGGTGAT   |
| ABCG8        | F: | CTGTGGAATGGGACTGTACTTC  |
|              | R: | GTTGGACTGACCACTGTAGGT   |
| Ces2c        | F: | GCCAACCCCATCAGAAACACA   |
|              | R: | TTCAGCATGTCAAGATTTTGCAG |
| 18S ribosome | F: | AGTCCCTGCCCTTTGTACACA   |
|              | R: | CGATCCGAGGGCCTCACTA     |

Supplementary Table S2. Differentially expressed genes (59) in the liver of HFA-fed mice compared to HF-fed mice.

| ID                 | Symbol                    | Expr Log Ratio | Expr P-value | Expr False Discovery Rate (q-value) |
|--------------------|---------------------------|----------------|--------------|-------------------------------------|
| ENSMUSG00000053168 | 9030619P08Rik             | 1.050132497    | 2.11E-05     | 9.93E-03                            |
| ENSMUSG00000040584 | ABCB1                     | 1.966583642    | 8.74E-05     | 2.92E-02                            |
| ENSMUSG00000055782 | ABCD2                     | -1.708393761   | 8.21E-13     | 1.90E-08                            |
| ENSMUSG00000024254 | ABCG8                     | 1.070794203    | 5.15E-05     | 1.86E-02                            |
| ENSMUSG00000069170 | ADGRV1                    | 2.268584488    | 3.60E-05     | 1.41E-02                            |
| ENSMUSG00000024411 | AQP4                      | 1.535961108    | 1.41E-05     | 7.26E-03                            |
| ENSMUSG00000074794 | ARRDC3                    | 1.103159466    | 8.31E-05     | 2.82E-02                            |
| ENSMUSG00000022508 | BCL6                      | 1.864520818    | 1.45E-07     | 2.79E-04                            |
| ENSMUSG00000015854 | CD5L                      | -1.341182353   | 1.91E-07     | 3.16E-04                            |
| ENSMUSG00000061825 | Ces2c                     | 1.096634714    | 2.66E-07     | 3.42E-04                            |
| ENSMUSG00000001128 | CFP                       | -1.19413972    | 8.52E-06     | 5.27E-03                            |
| ENSMUSG00000030364 | Clec2e/Clec2h             | 1.749863847    | 3.52E-08     | 9.82E-05                            |
| ENSMUSG00000023349 | CLEC6A                    | -1.093727114   | 4.99E-06     | 3.60E-03                            |
| ENSMUSG00000032310 | CYP1A2                    | 1.327416164    | 1.55E-04     | 4.22E-02                            |
| ENSMUSG00000030483 | CYP2B6                    | 3.876652384    | 2.82E-05     | 1.25E-02                            |
| ENSMUSG00000096852 | Cyp2d9 (includes others)  | 1.846693101    | 7.70E-06     | 5.08E-03                            |
| ENSMUSG00000061292 | Cyp3a25 (includes others) | 1.066023232    | 2.46E-07     | 3.42E-04                            |

|                    |                           |              |          |          |
|--------------------|---------------------------|--------------|----------|----------|
| ENSMUSG00000028715 | Cyp4a14                   | -1.445562446 | 2.95E-05 | 1.28E-02 |
| ENSMUSG00000078597 | CYP4A22                   | 1.567665167  | 6.05E-08 | 1.40E-04 |
| ENSMUSG00000059824 | DBP                       | 1.521933071  | 1.38E-04 | 4.12E-02 |
| ENSMUSG00000034258 | FLVCR2                    | -1.378087417 | 3.30E-05 | 1.36E-02 |
| ENSMUSG00000021765 | FST                       | -1.185677268 | 1.46E-04 | 4.22E-02 |
| ENSMUSG00000033676 | GABRB3                    | 2.424885904  | 8.34E-07 | 8.76E-04 |
| ENSMUSG00000092021 | GBP6                      | 1.267405836  | 4.20E-05 | 1.56E-02 |
| ENSMUSG00000046167 | GLDN                      | -2.609200138 | 4.70E-05 | 1.72E-02 |
| ENSMUSG00000110151 | Gm38416                   | 2.065365834  | 1.72E-05 | 8.66E-03 |
| ENSMUSG00000106069 | Gm6135                    | 2.560421724  | 1.84E-05 | 9.02E-03 |
| ENSMUSG00000005413 | HMOX1                     | -1.083035223 | 8.25E-08 | 1.73E-04 |
| ENSMUSG00000034459 | IFIT1B                    | 1.169621236  | 9.44E-05 | 3.03E-02 |
| ENSMUSG00000026822 | LCN2                      | -1.110731163 | 1.42E-04 | 4.14E-02 |
| ENSMUSG00000053846 | LIPG                      | 1.365056607  | 3.33E-05 | 1.36E-02 |
| ENSMUSG00000020623 | MAP2K6                    | 1.405482404  | 1.03E-04 | 3.21E-02 |
| ENSMUSG00000031765 | Mt1                       | -2.768590222 | 1.02E-05 | 5.88E-03 |
| ENSMUSG00000073830 | Mup1 (includes<br>others) | 2.7377345    | 3.35E-05 | 1.36E-02 |
| ENSMUSG00000028469 | NPR2                      | 1.25897042   | 1.01E-04 | 3.20E-02 |
| ENSMUSG00000020889 | NR1D1                     | 1.089424706  | 1.81E-04 | 4.64E-02 |
| ENSMUSG00000061540 | Orm1 (includes<br>others) | -1.361172326 | 1.45E-10 | 1.12E-06 |
| ENSMUSG00000047617 | PAXX                      | 1.145315187  | 2.52E-05 | 1.16E-02 |

|                    |               |              |          |          |
|--------------------|---------------|--------------|----------|----------|
| ENSMUSG00000094800 | Plac9a        | -5.018315556 | 8.99E-06 | 5.32E-03 |
| ENSMUSG00000050423 | PPP1R3G       | -3.241620484 | 3.61E-05 | 1.41E-02 |
| ENSMUSG00000070368 | PROK1         | 1.846908518  | 2.62E-05 | 1.18E-02 |
| ENSMUSG00000057729 | PRTN3         | -2.965458788 | 1.07E-05 | 6.01E-03 |
| ENSMUSG00000015090 | PTGDS         | 5.946682494  | 3.75E-06 | 2.94E-03 |
| ENSMUSG00000053219 | Raet1d/Raet1e | -1.773962543 | 2.71E-06 | 2.32E-03 |
| ENSMUSG00000089809 | RASGEF1B      | -1.132064218 | 7.24E-05 | 2.50E-02 |
| ENSMUSG00000097451 | Rian          | 1.42185645   | 3.93E-05 | 1.49E-02 |
| ENSMUSG00000108884 | RP23-306P12.3 | 2.140985226  | 1.68E-04 | 4.42E-02 |
| ENSMUSG00000026249 | SERPINE2      | 1.455780612  | 1.00E-06 | 9.63E-04 |
| ENSMUSG00000053862 | SLC51B        | 3.042332638  | 1.09E-09 | 6.27E-06 |
| ENSMUSG00000020027 | SOCS2         | 1.204201187  | 8.43E-06 | 5.27E-03 |
| ENSMUSG00000024427 | SPRY4         | 2.314914733  | 6.98E-06 | 4.74E-03 |
| ENSMUSG00000022885 | ST6GAL1       | -1.005122668 | 1.91E-07 | 3.16E-04 |
| ENSMUSG00000029272 | SULT1E1       | 1.691571636  | 2.24E-06 | 1.99E-03 |
| ENSMUSG00000029553 | TFEC          | -1.343826518 | 9.41E-05 | 3.03E-02 |
| ENSMUSG00000035686 | THRSP         | 1.869408552  | 1.30E-08 | 4.98E-05 |
| ENSMUSG00000026109 | TMEFF2        | 3.396736161  | 3.15E-05 | 1.35E-02 |
| ENSMUSG00000051682 | Trem14        | -1.182741011 | 8.68E-06 | 5.27E-03 |
| ENSMUSG00000032010 | USP2          | 1.604780387  | 5.49E-06 | 3.84E-03 |
| ENSMUSG00000044206 | VSIG4         | -1.211180096 | 1.69E-04 | 4.42E-02 |

Uncropped western blots used in Figure 3d

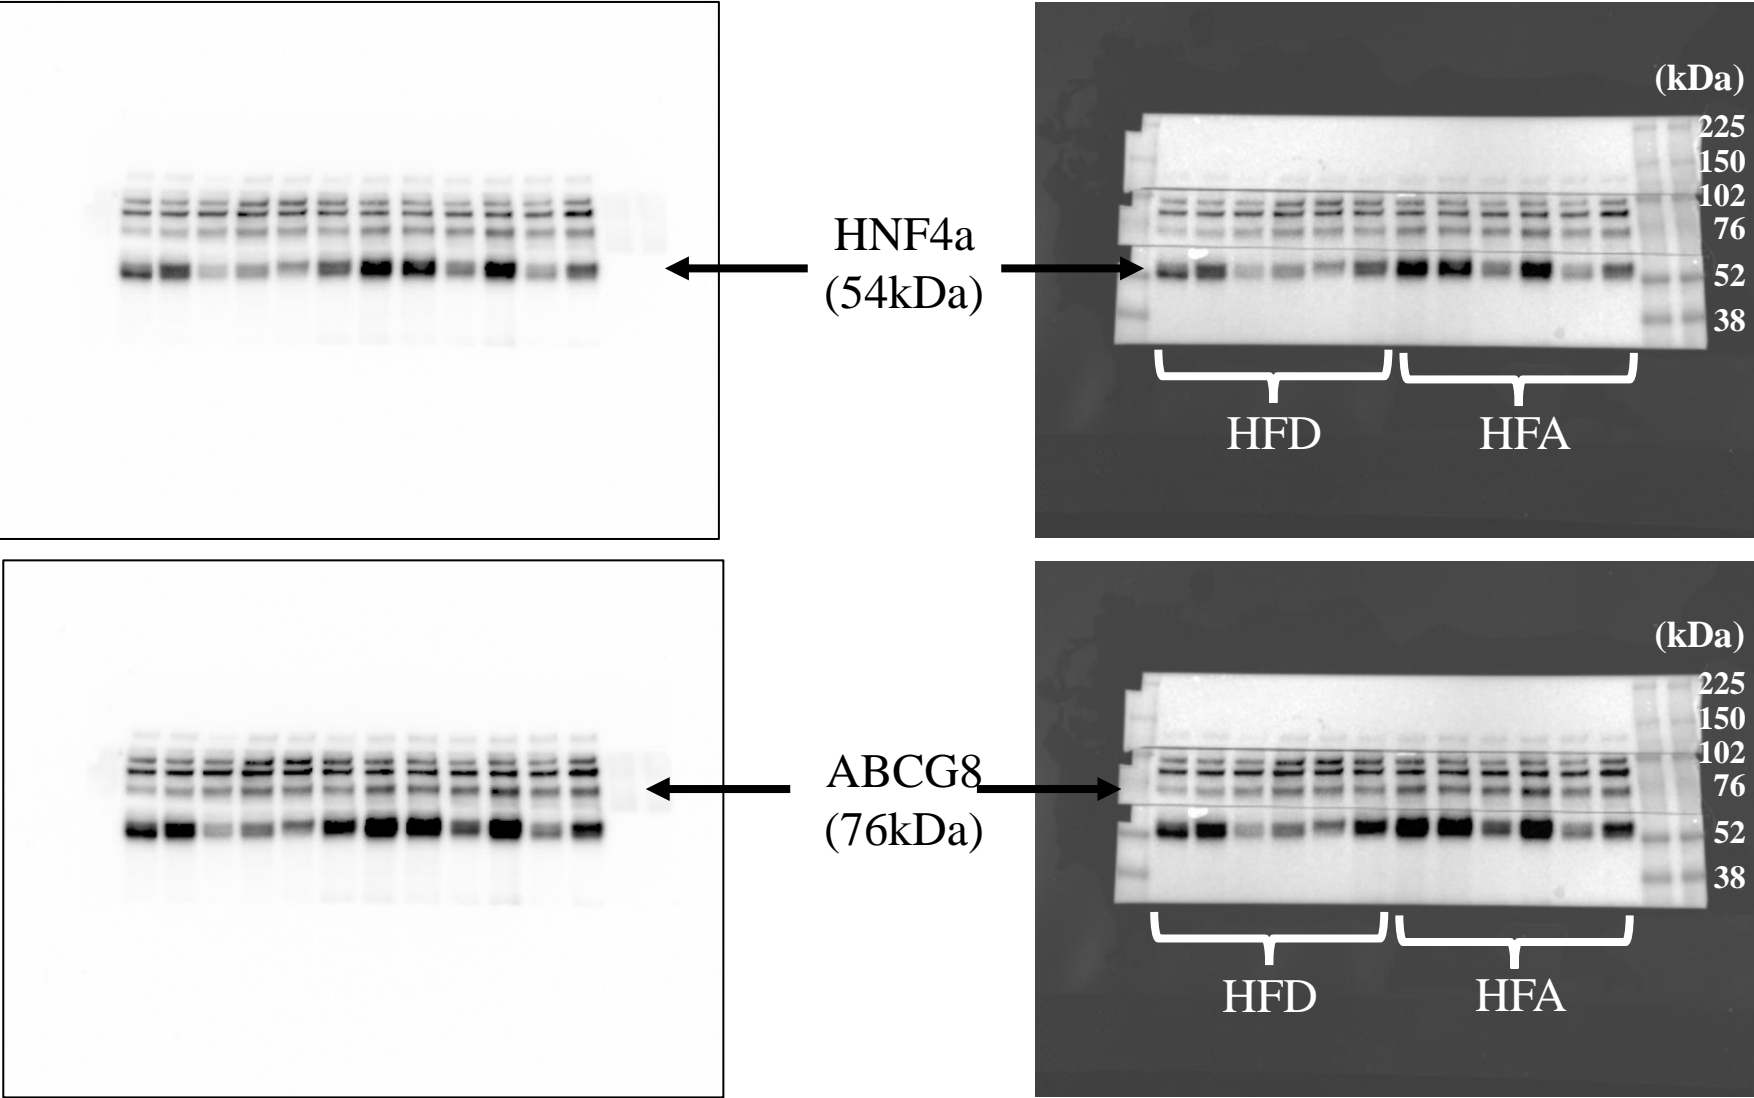

Uncropped western blots used in Figure 3d

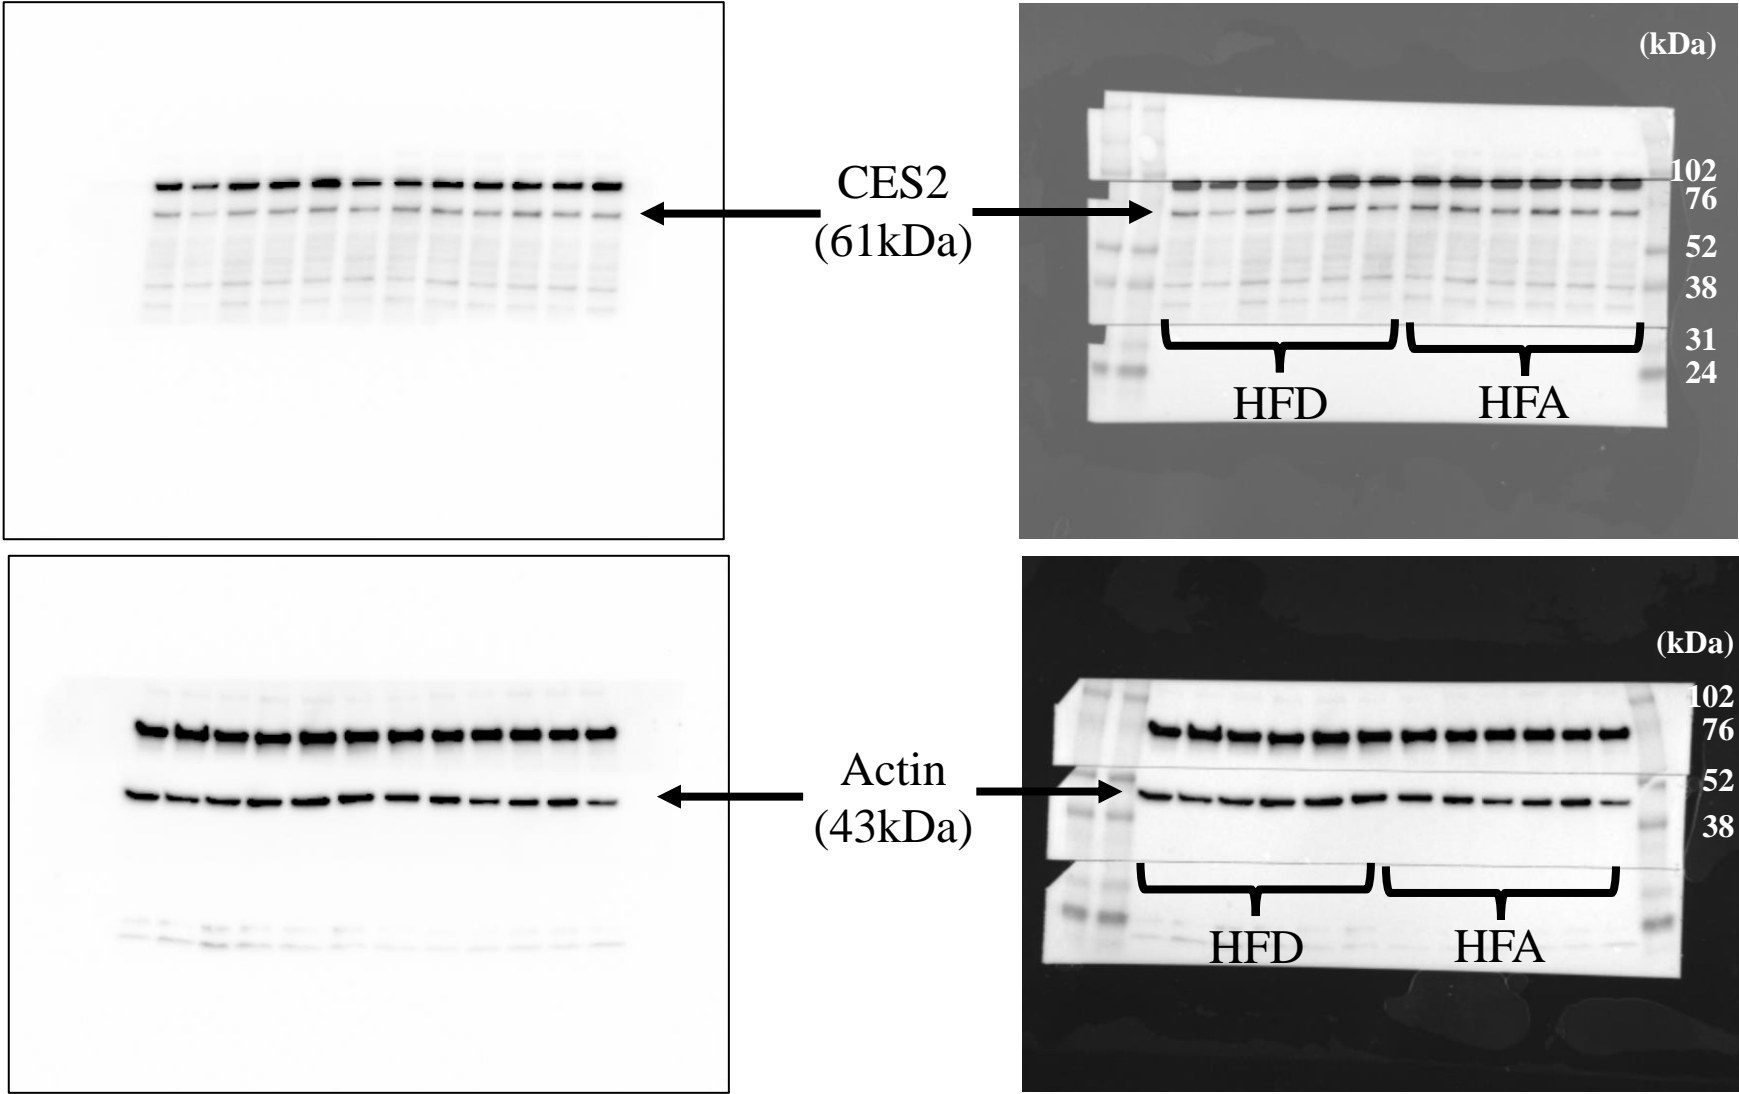

Supplement: 41598_2023_50625_MOESM1_ESM.pdf [file 41598_2023_50625_MOESM1_ESM.pdf]
